# Supplementary material for: Effects of brining and standardized drying on the composition, shelf stability, microbial safety and antioxidant status of four wild edible vegetables
Source: Royal Society of Chemistry journal article supplement (doi:10.1039/d4fb00078a), 2024-01-01
Supplement: d4fb00078a1.pdf [file d4fb00078a1.pdf]

**SUPPLEMENTARY DATA**

**Table S1: Experimental layout of the independent variables and their responses for Samtawk as given by CCFC model**

| Run | Temperature<br>°C | Time<br>min                    | Moisture Content<br>%   | Total Phenolic Content<br>mg GAE/g | DRSA<br>%                |
|-----|-------------------|--------------------------------|-------------------------|------------------------------------|--------------------------|
| 1   | 60                | 360                            | 7.98±0.02 <sup>a</sup>  | 21.71±0.51 <sup>a</sup>            | 91.79±0.88 <sup>a</sup>  |
| 2   | 60                | 450                            | 5.58±0.11 <sup>be</sup> | 26.03±0.62 <sup>b</sup>            | 94.89±1.01 <sup>b</sup>  |
| 3   | 80                | 540                            | 1.94±0.02 <sup>c</sup>  | 39.68±1.10 <sup>c</sup>            | 97.32±1.10 <sup>c</sup>  |
| 4   | 80                | 450                            | 3.68±0.14 <sup>d</sup>  | 35.19±0.06 <sup>d</sup>            | 95.12±0.87 <sup>b</sup>  |
| 5   | 60                | 450                            | 6.02±0.17 <sup>e</sup>  | 27.12±0.82 <sup>e</sup>            | 93.72±0.30 <sup>bd</sup> |
| 6   | 60                | 450                            | 5.97±0.44 <sup>be</sup> | 26.39±0.44 <sup>be</sup>           | 94.16±0.81 <sup>bd</sup> |
| 7   | 60                | 450                            | 5.73±0.19 <sup>be</sup> | 26.37±0.40 <sup>be</sup>           | 93.92±1.02 <sup>bd</sup> |
| 8   | 80                | 360                            | 5.01±0.04 <sup>b</sup>  | 31.49±0.29 <sup>f</sup>            | 92.37±0.33 <sup>e</sup>  |
| 9   | 40                | 540                            | 7.21±0.04 <sup>a</sup>  | 29.61±0.11 <sup>g</sup>            | 92.69±0.44 <sup>e</sup>  |
| 10  | 40                | 360                            | 13.68±0.12 <sup>e</sup> | 21.78±0.06 <sup>a</sup>            | 89.38±0.52 <sup>f</sup>  |
| 11  | 40                | 450                            | 10.93±0.06 <sup>f</sup> | 24.89±0.09 <sup>h</sup>            | 90.21±0.60 <sup>g</sup>  |
| 12  | 60                | 540                            | 3.67±0.04 <sup>d</sup>  | 30.11±0.77 <sup>g</sup>            | 95.62±1.22 <sup>b</sup>  |
| 13  | 60                | 450                            | 5.79±0.07 <sup>be</sup> | 26.83±0.44 <sup>be</sup>           | 93.69±0.60 <sup>d</sup>  |
|     |                   | <b>R<sup>2</sup></b>           | <b>0.9973</b>           | <b>0.9938</b>                      | <b>0.9703</b>            |
|     |                   | <b>Adjusted R<sup>2</sup></b>  | <b>0.9954</b>           | <b>0.9894</b>                      | <b>0.9491</b>            |
|     |                   | <b>Predicted R<sup>2</sup></b> | <b>0.9848</b>           | <b>0.9694</b>                      | <b>0.8633</b>            |

**Table S2: Analysis of variance showing the quadratic interaction and the lack of fit of the response variables for Samtawk**

| Source of variation | Response variable |                  |                    |                        |                    |                |                      |
|---------------------|-------------------|------------------|--------------------|------------------------|--------------------|----------------|----------------------|
|                     | df                | Moisture content |                    | Total Phenolic Content |                    | DRSA           |                      |
|                     |                   | Sum of squares   | F value            | Sum of squares         | F value            | Sum of squares | F value              |
| Regression          | 5                 | 114.86           | 516.72*            | 303.86                 | 224.44*            | 55.27          | 45.77*               |
| Residual error      | 7                 | 0.3112           |                    | 1.90                   |                    | 1.69           |                      |
| Lack of fit         | 3                 | 0.1821           | 1.88 <sup>ns</sup> | 1.16                   | 2.12 <sup>ns</sup> | 0.7211         | 0.9915 <sup>ns</sup> |
| Pure error          | 4                 | 0.1291           |                    | 0.7317                 |                    | 0.9697         |                      |
| Cor total           | 12                | 115.17           |                    | 305.75                 |                    | 56.97          |                      |

\* Significant at  $p \leq 0.05$ ; <sup>ns</sup> not significant

**Table S3: Experimental layout of the independent variables and their responses for Tawkpui as given by CCFC model**

| Run                            | Temperature<br>°C | Time<br>min | Moisture Content<br>%   | Total Phenolic Content<br>mg GAE/g | DRSA<br>%               |
|--------------------------------|-------------------|-------------|-------------------------|------------------------------------|-------------------------|
| 1                              | 60                | 360         | 7.56±0.22 <sup>a</sup>  | 22.68±0.81 <sup>a</sup>            | 74.73±0.50 <sup>a</sup> |
| 2                              | 60                | 450         | 5.08±0.19 <sup>b</sup>  | 27.93±0.59 <sup>b</sup>            | 78.32±0.22 <sup>b</sup> |
| 3                              | 80                | 540         | 1.74±0.12 <sup>c</sup>  | 41.08±0.61 <sup>c</sup>            | 82.32±0.82 <sup>c</sup> |
| 4                              | 80                | 450         | 2.18±0.14 <sup>d</sup>  | 37.89±0.44 <sup>d</sup>            | 80.62±0.59 <sup>d</sup> |
| 5                              | 60                | 450         | 5.81±0.08 <sup>b</sup>  | 29.65±0.22 <sup>e</sup>            | 78.89±0.40 <sup>e</sup> |
| 6                              | 60                | 450         | 5.69±0.12 <sup>b</sup>  | 29.98±0.08 <sup>e</sup>            | 78.05±0.29 <sup>e</sup> |
| 7                              | 60                | 450         | 5.73±0.11 <sup>b</sup>  | 29.76±1.11 <sup>e</sup>            | 78.99±0.62 <sup>e</sup> |
| 8                              | 80                | 360         | 4.89±0.06 <sup>b</sup>  | 35.29±0.06 <sup>f</sup>            | 76.08±1.02 <sup>f</sup> |
| 9                              | 40                | 540         | 7.02±0.61 <sup>a</sup>  | 30.23±0.22 <sup>g</sup>            | 76.82±0.81 <sup>f</sup> |
| 10                             | 40                | 360         | 12.88±0.14 <sup>e</sup> | 22.98±0.29 <sup>a</sup>            | 72.53±0.89 <sup>g</sup> |
| 11                             | 40                | 450         | 9.87±0.04 <sup>f</sup>  | 25.89±0.51 <sup>h</sup>            | 74.01±0.44 <sup>a</sup> |
| 12                             | 60                | 540         | 2.87±0.07 <sup>g</sup>  | 31.07±0.62 <sup>i</sup>            | 80.09±0.44 <sup>d</sup> |
| 13                             | 60                | 450         | 5.43±0.06 <sup>b</sup>  | 27.82±1.14 <sup>b</sup>            | 78.09±0.20 <sup>b</sup> |
| <b>R<sup>2</sup></b>           |                   |             | <b>0.9878</b>           | <b>0.9691</b>                      | <b>0.9699</b>           |
| <b>Ajusted R<sup>2</sup></b>   |                   |             | <b>0.9792</b>           | <b>0.9470</b>                      | <b>0.9484</b>           |
| <b>Predicted R<sup>2</sup></b> |                   |             | <b>0.9227</b>           | <b>0.8476</b>                      | <b>0.7902</b>           |

**Table S4: Analysis of variance showing the quadratic interaction and the lack of fit of the response variables for Tawkpui**

| Source of variation | Response variable |                  |                    |                        |                    |                |                    |
|---------------------|-------------------|------------------|--------------------|------------------------|--------------------|----------------|--------------------|
|                     | df                | Moisture content |                    | Total Phenolic Content |                    | DRSA           |                    |
|                     |                   | Sum of squares   | F value            | Sum of squares         | F value            | Sum of squares | F value            |
| Regression          | 5                 | 109.46           | 113.74*            | 332.19                 | 43.91*             | 90.83          | 45.03*             |
| Residual error      | 7                 | 1.35             |                    | 10.59                  |                    | 2.82           |                    |
| Lack of fit         | 3                 | 0.9924           | 3.73 <sup>ns</sup> | 6.10                   | 1.81 <sup>ns</sup> | 1.99           | 3.18 <sup>ns</sup> |
| Pure error          | 4                 | 0.3549           |                    | 4.49                   |                    | 0.8341         |                    |
| Cor total           | 12                | 110.81           |                    | 342.78                 |                    | 93.65          |                    |

\* Significant at  $p \leq 0.05$ ; <sup>ns</sup> not significant

**Table S5: Experimental layout of the independent variables and their responses for Tawkte as given by CCFC model**

| Run | Temperature | Time                           | Moisture Content        | Total Phenolic Content   | DRSA                     |
|-----|-------------|--------------------------------|-------------------------|--------------------------|--------------------------|
|     | °C          | min                            | %                       | mg GAE/g                 | %                        |
| 1   | 60          | 360                            | 5.93±0.03 <sup>a</sup>  | 41.29±0.40 <sup>a</sup>  | 93.58±0.77 <sup>a</sup>  |
| 2   | 60          | 450                            | 3.46±0.45 <sup>b</sup>  | 48.35±0.81 <sup>b</sup>  | 95.09±1.01 <sup>b</sup>  |
| 3   | 80          | 540                            | 1.02±0.07 <sup>c</sup>  | 63.26±0.62 <sup>c</sup>  | 98.63±1.02 <sup>c</sup>  |
| 4   | 80          | 450                            | 1.69±0.02 <sup>c</sup>  | 50.21±0.29 <sup>d</sup>  | 96.43±0.77 <sup>de</sup> |
| 5   | 60          | 450                            | 3.78±0.12 <sup>b</sup>  | 46.29±0.86 <sup>e</sup>  | 95.15±0.29 <sup>e</sup>  |
| 6   | 60          | 450                            | 3.91±0.03 <sup>b</sup>  | 47.91±0.60 <sup>f</sup>  | 95.01±0.22 <sup>e</sup>  |
| 7   | 60          | 450                            | 3.67±0.02 <sup>b</sup>  | 46.98±0.40 <sup>ef</sup> | 95.11±0.50 <sup>e</sup>  |
| 8   | 80          | 360                            | 3.12±0.05 <sup>b</sup>  | 42.17±0.47 <sup>g</sup>  | 92.84±0.33 <sup>a</sup>  |
| 9   | 40          | 540                            | 5.69±0.22 <sup>a</sup>  | 42.37±0.20 <sup>g</sup>  | 93.78±0.63 <sup>a</sup>  |
| 10  | 40          | 360                            | 11.88±0.43 <sup>d</sup> | 34.29±0.40 <sup>h</sup>  | 90.12±0.70 <sup>f</sup>  |
| 11  | 40          | 450                            | 9.67±0.07 <sup>e</sup>  | 37.63±0.59 <sup>i</sup>  | 91.77±0.45 <sup>g</sup>  |
| 12  | 60          | 540                            | 2.96±0.83 <sup>b</sup>  | 51.97±0.55 <sup>j</sup>  | 97.19±1.02 <sup>d</sup>  |
| 13  | 60          | 450                            | 5.13±0.62 <sup>a</sup>  | 47.26±0.62 <sup>ef</sup> | 95.75±0.62 <sup>e</sup>  |
|     |             | <b>R<sup>2</sup></b>           | <b>0.9723</b>           | <b>0.9891</b>            | <b>0.9813</b>            |
|     |             | <b>Adjusted R<sup>2</sup></b>  | <b>0.9526</b>           | <b>0.9813</b>            | <b>0.9679</b>            |
|     |             | <b>Predicted R<sup>2</sup></b> | <b>0.8650</b>           | <b>0.9379</b>            | <b>0.8670</b>            |

**Table S6: Analysis of variance showing the quadratic interaction and the lack of fit of the response variables for Tawkte**

| Source of variation | Response variable |                  |         |                        |         |        |         |
|---------------------|-------------------|------------------|---------|------------------------|---------|--------|---------|
|                     | df                | Moisture content |         | Total Phenolic Content |         | DRSA   |         |
|                     |                   | Sum of           | F value | Sum of                 | F value | Sum of | F value |

|                |    | <b>squares</b> |                    | <b>squares</b> |                    | <b>squares</b> |                    |
|----------------|----|----------------|--------------------|----------------|--------------------|----------------|--------------------|
| Regression     | 5  | 108.00         | 49.22*             | 513.67         | 126.90*            | 60.30          | 78.38*             |
| Residual error | 7  | 3.07           |                    | 5.67           |                    | 1.15           |                    |
| Lack of fit    | 3  | 1.34           | 1.03 <sup>ns</sup> | 3.35           | 1.93 <sup>ns</sup> | 0.7916         | 2.94 <sup>ns</sup> |
| Pure error     | 4  | 1.73           |                    | 2.32           |                    | 0.3589         |                    |
| Cor total      | 12 | 111.08         |                    | 519.34         |                    | 61.45          |                    |

\* Significant at  $p \leq 0.05$ ; <sup>ns</sup> not significant

**Table S7: Experimental layout of the independent variables and their responses for Japan Zawngtah as given by CCFC model**

| Run | Temperature<br>°C | Time<br>min                    | Moisture<br>Content<br>% | Total Phenolic<br>Content<br>mg GAE/g | DRSA<br>%               |
|-----|-------------------|--------------------------------|--------------------------|---------------------------------------|-------------------------|
| 1   | 60                | 360                            | 5.22±0.06 <sup>a</sup>   | 20.10±0.70 <sup>a</sup>               | 81.89±1.02 <sup>a</sup> |
| 2   | 60                | 450                            | 4.34±0.06 <sup>b</sup>   | 24.56±1.04 <sup>b</sup>               | 86.09±0.92 <sup>b</sup> |
| 3   | 80                | 540                            | 1.04±0.04 <sup>c</sup>   | 39.87±1.11 <sup>c</sup>               | 96.19±1.45 <sup>c</sup> |
| 4   | 80                | 450                            | 2.08±0.07 <sup>d</sup>   | 34.19±0.92 <sup>d</sup>               | 91.12±1.03 <sup>d</sup> |
| 5   | 60                | 450                            | 4.12±0.10 <sup>b</sup>   | 26.12±0.63 <sup>ef</sup>              | 87.02±0.70 <sup>b</sup> |
| 6   | 60                | 450                            | 4.23±0.04 <sup>b</sup>   | 26.89±1.14 <sup>e</sup>               | 86.59±1.10 <sup>b</sup> |
| 7   | 60                | 450                            | 4.76±0.12 <sup>b</sup>   | 25.76±1.10 <sup>f</sup>               | 87.04±0.78 <sup>b</sup> |
| 8   | 80                | 360                            | 2.67±0.07 <sup>d</sup>   | 29.58±0.82 <sup>g</sup>               | 84.23±0.75 <sup>e</sup> |
| 9   | 40                | 540                            | 5.21±0.02 <sup>a</sup>   | 23.03±0.70 <sup>h</sup>               | 85.22±0.63 <sup>e</sup> |
| 10  | 40                | 360                            | 7.23±0.14 <sup>e</sup>   | 18.43±0.60 <sup>i</sup>               | 79.42±1.11 <sup>f</sup> |
| 11  | 40                | 450                            | 6.73±0.11 <sup>e</sup>   | 21.23±0.44 <sup>j</sup>               | 83.10±1.23 <sup>g</sup> |
| 12  | 60                | 540                            | 3.01±0.08 <sup>d</sup>   | 30.11±1.13 <sup>g</sup>               | 89.62±0.88 <sup>h</sup> |
| 13  | 60                | 450                            | 3.51±0.04 <sup>d</sup>   | 27.03±0.92 <sup>k</sup>               | 87.69±0.63 <sup>b</sup> |
|     |                   | <b>R<sup>2</sup></b>           | <b>0.9741</b>            | <b>0.9825</b>                         | <b>0.9912</b>           |
|     |                   | <b>Adjusted R<sup>2</sup></b>  | <b>0.9556</b>            | <b>0.9700</b>                         | <b>0.9849</b>           |
|     |                   | <b>Predicted R<sup>2</sup></b> | <b>0.9355</b>            | <b>0.9116</b>                         | <b>0.9678</b>           |

**Table S8: Analysis of variance showing the quadratic interaction and the lack of fit of the response variables for Japan Zawngtah**

| Source of variation | Response variable |                  |                        |      |
|---------------------|-------------------|------------------|------------------------|------|
|                     | df                | Moisture content | Total Phenolic Content | DRSA |
|                     |                   |                  |                        |      |

|                |    | Sum of squares | F value              | Sum of squares | F value            | Sum of squares       | F value              |
|----------------|----|----------------|----------------------|----------------|--------------------|----------------------|----------------------|
| Regression     | 5  | 35.75          | 52.60*               | 403.56         | 78.57              | 214.91               | 157.34*              |
| Residual error | 7  | 0.9510         |                      | 7.19           |                    | 1.91                 |                      |
| Lack of fit    | 3  | 0.1347         | 0.2200 <sup>ns</sup> | 3.22           | 1.08 <sup>ns</sup> | 0.5029 <sup>ns</sup> | 0.4758 <sup>ns</sup> |
| Pure error     | 4  | 0.8163         |                      | 3.97           |                    | 1.41                 |                      |
| Cor total      | 12 | 36.68          |                      | 410.76         |                    | 216.82               |                      |

\* Significant at  $p \leq 0.05$ ; <sup>ns</sup> not significant

### Regression equations for impact of independent variables on the responses of each vegetable

#### SAMTAWK

Moisture content

$$Y = 5.87 - 3.53 X_1 - 2.31 X_2 + 1.32 X_1^2 - 0.1629 X_2^2 + 0.8500 X_1 X_2 \quad \text{E1}$$

Total phenolic content

$$Y = 26.38 + 5.01 X_1 + 4.07 X_2 - 4.01 X_1^2 - 0.0403 X_2^2 + 0.090 X_1 X_2 \quad \text{E2}$$

DRSA

$$Y = 93.99 + 2.09 X_1 + 2.01 X_2 - 1.10 X_1^2 - 0.0591 X_2^2 + 0.4100 X_1 X_2 \quad \text{E3}$$

#### TAWKPUI

Moisture content

$$Y = 5.42 - 3.49 X_1 - 2.28 X_2 + 0.9310 X_1^2 + 0.1210 X_2^2 + 0.6775 X_1 X_2 \quad \text{E4}$$

Total phenolic content

$$Y = 28.66 + 5.86 X_1 + 3.57 X_2 - 4.15 X_1^2 - 0.8698 X_2^2 - 0.3650 X_1 X_2 \quad \text{E5}$$

DRSA

$$Y = 78.55 + 2.61 X_1 + 2.65 X_2 - 0.927 X_1^2 - 0.8329 X_2^2 + 0.4875 X_1 X_2 \quad \text{E6}$$

#### TAWKTE

Moisture content

$$Y = 4.09 - 3.57 X_1 - 1.88 X_2 + 1.35 X_1^2 + 0.1134 X_2^2 - 1.02 X_1 X_2 \quad \text{E7}$$

Total phenolic content

$$Y = 47.13 + 6.36 X_1 + 6.11 X_2 - 2.69 X_1^2 + 0.0233 X_2^2 + 2.45 X_1 X_2 \quad \text{E8}$$

DRSA

$$Y = 95.28 + 2.04 X_1 + 2.18 X_2 - 1.32 X_1^2 - 0.400 X_2^2 + 0.5325 X_1 X_2 \quad \text{E9}$$

### JAPAN ZAWNGTAH

Moisture

$$Y = 4.23 - 2.23 X_1 - 0.9767 X_2 + 0.728 X_1^2 - 0.2172 X_2^2 + 0.0975 X_1 X_2 \quad \text{E10}$$

Total phenolic content

$$Y = 25.94 + 6.82 X_1 + 4.15 X_2 + 2.11 X_1^2 - 0.4917 X_2^2 + 1.42 X_1 X_2 \quad \text{E11}$$

DRSA

$$Y = 86.85 + 3.97 X_1 + 4.25 X_2 - 0.3621 X_1^2 - 0.9929 X_2^2 + 1.54 X_1 X_2 \quad \text{E12}$$

**Table S9: Pearson's coefficient (two tailed) showing correlation between independent variables and their responses for each vegetable**

|                           | Moisture content |          |          |          | TPC     |         |        |         | DRSA   |        |        |         |
|---------------------------|------------------|----------|----------|----------|---------|---------|--------|---------|--------|--------|--------|---------|
|                           | ST               | TP       | TT       | JZ       | ST      | TP      | TT     | JZ      | ST     | TP     | TT     | JZ      |
| <b>Drying temperature</b> | -0.806**         | -0.813** | -0.829** | -0.902** | 0.702** | 0.775** | 0.678* | 0.825** | 0.678* | 0.667* | 0.683* | 0.660*  |
| <b>Drying time</b>        | -0.527           | -0.531   | -0.436   | -0.395   | 0.569*  | 0.473   | 0.653* | 0.502   | 0.654* | 0.677* | 0.627* | 0.707** |

\*\*Correlation significant at the 0.01 level

\*Correlation significant at the 0.05 level

**Table S10: Estimated optimal conditions of the independent variables for each vegetable**

| <b>Factors</b>           | <b>Low level</b> | <b>High Level</b> | <b>Optimal level</b> |
|--------------------------|------------------|-------------------|----------------------|
| Drying temperature ((°C) | 40               | 80                | 80                   |
| Drying Time (min)        | 360              | 540               | 540                  |

**Table S11: The predicted and experimental values of the responses for each vegetable**

| <b>Vegetables</b>     | <b>Responses</b>                  | <b>Predicted value</b> | <b>Experimental value</b> |
|-----------------------|-----------------------------------|------------------------|---------------------------|
| <b>Samtawk</b>        | Moisture content (% w.b)          | 2.0369                 | 1.8962                    |
|                       | Total Phenolic Content (mg GAE/g) | 39.5999                | 39.1870                   |
|                       | DRSA (%)                          | 97.3420                | 96.7025                   |
| <b>Tawkpui</b>        | Moisture content (% w.b)          | 1.3712                 | 1.45067                   |
|                       | Total Phenolic Content (mg GAE/g) | 41.0034                | 39.6175                   |
|                       | DRSA (%)                          | 82.5703                | 81.0006                   |
| <b>Tawkte</b>         | Moisture content (% w.b)          | 1.12698                | 1.1825                    |
|                       | Total Phenolic Content (mg GAE/g) | 59.3819                | 59.0333                   |
|                       | DRSA (%)                          | 98.6625                | 97.6464                   |
| <b>Japan Zawngtah</b> | Moisture content (% w.b)          | 0.9784                 | 0.9954                    |
|                       | Total Phenolic Content (mg GAE/g) | 39.9553                | 39.0622                   |
|                       | DRSA (%)                          | 95.9707                | 96.0467                   |

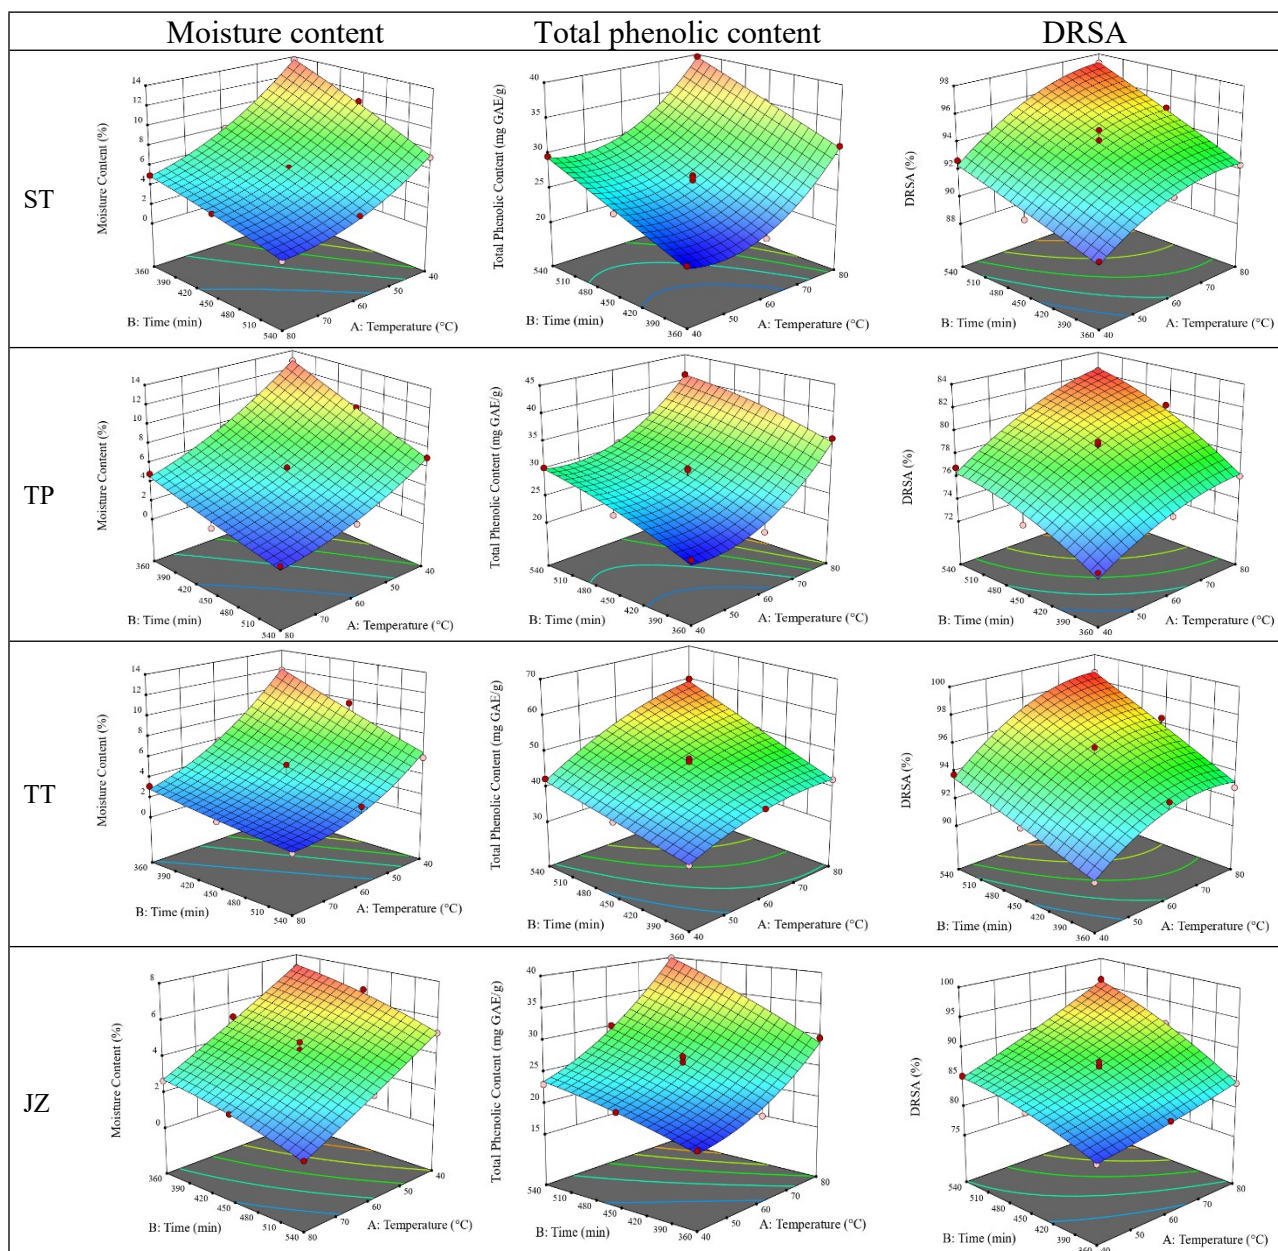

Fig S1. Variation of responses (moisture content, Total phenolic content and DRSA) due to the interaction between the independent variables (drying time and drying temperature on each vegetable); ST: Samtaw, TP: Tawkpui, TT: Tawkte, JZ: Japan Zawngtah



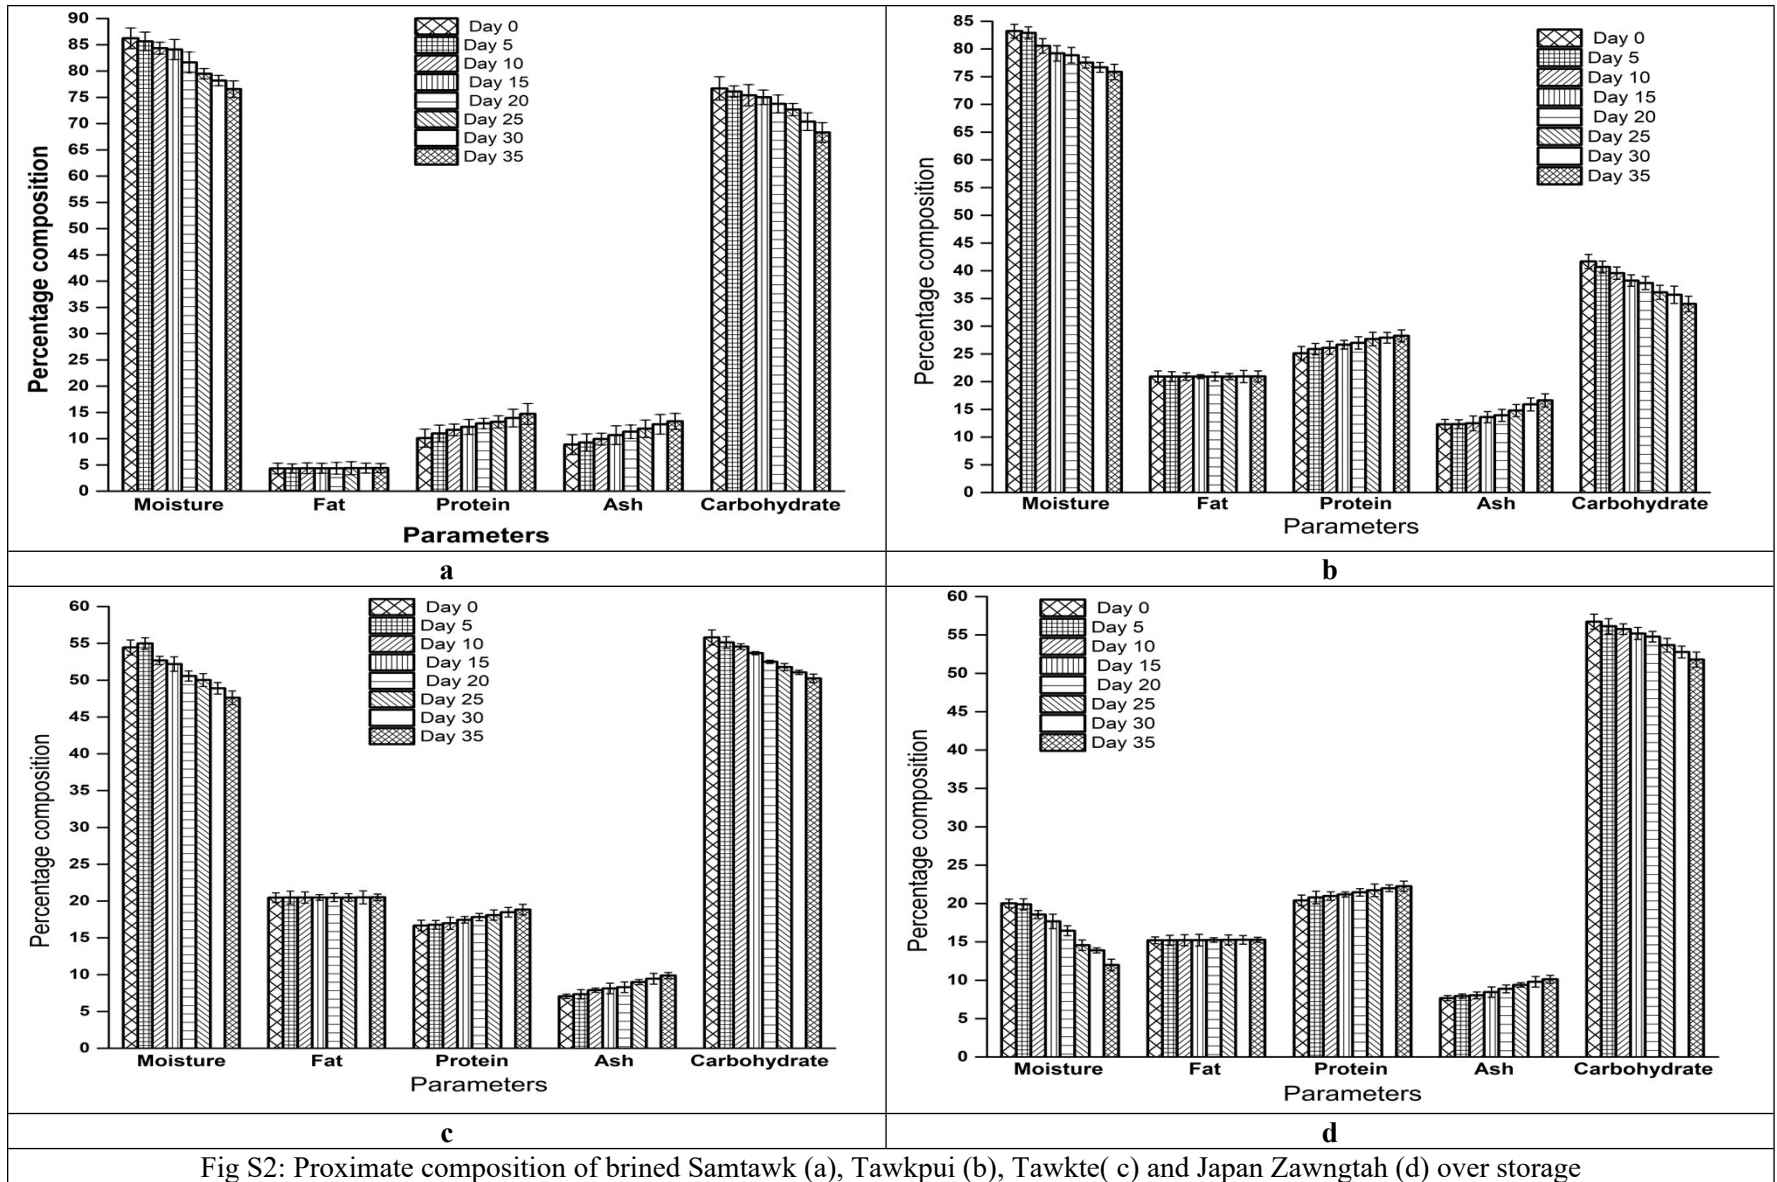

Fig S2: Proximate composition of brined Samtawk (a), Tawkpui (b), Tawkte(c) and Japan Zawngtah (d) over storage

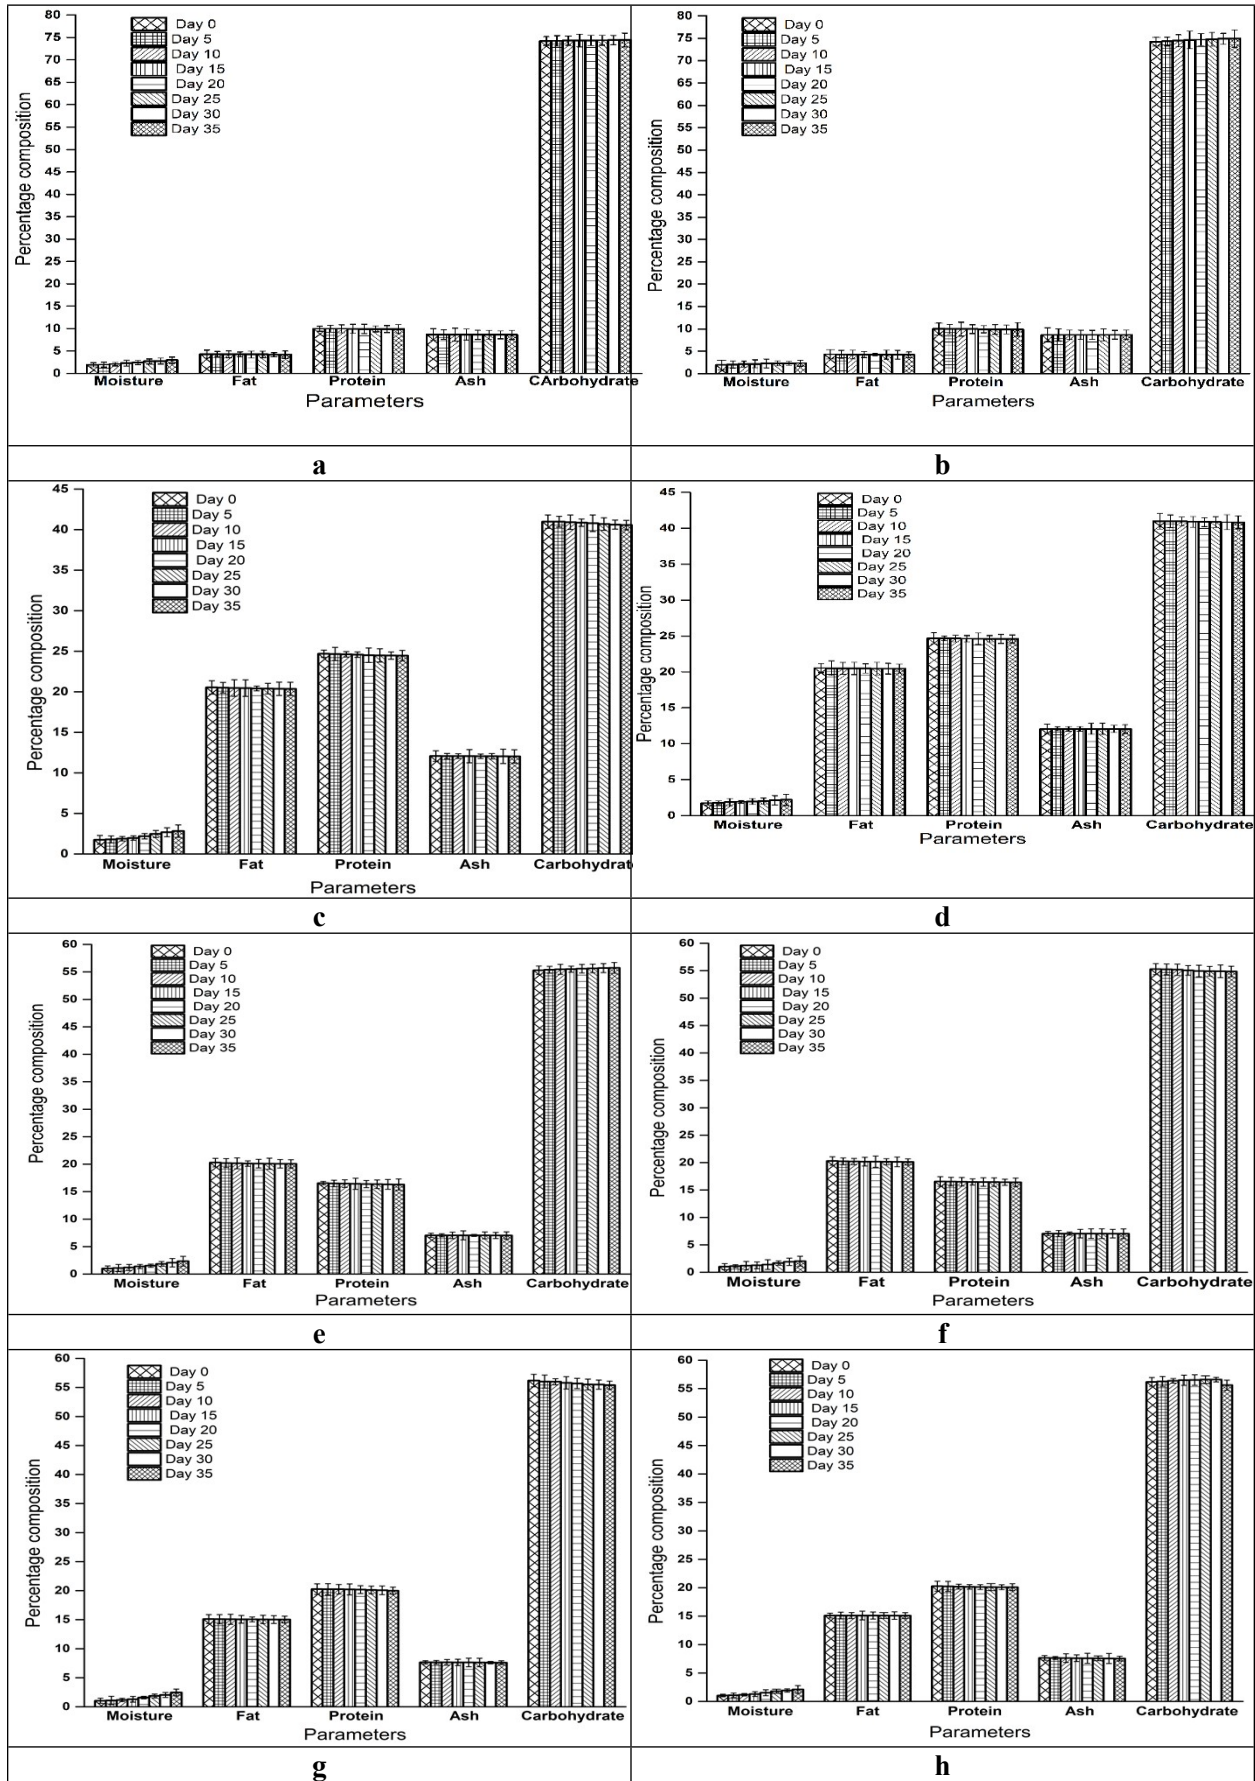

**Fig S3: Proximate composition of dried Samtawk RT (a) and RF (b), Tawkpui RT (c) and RF (d), Tawkte RT (e) and RF (f) and Japan Zawngtah RT (g) and RF (h) over time**
